# Supplementary material
Source: Springer Nature journal article supplement (https://www.springermedizin.de/resource/supplementary/12914_2013_318_MOESM2_ESM.pdf/9537198)
Supplement: MOESM2 [file 9537198]

## FGD Text

**Question:** Now I recall, *Masi* (aunt) had told me that they help in pushing

**Response:** Yes. They give *Kalla* (Fundal pressure) and try to push the baby down.  
Many women agree.

**Question:** Is it good or bad?

**Response:** It is not considered good but they still do that. They have to save the life of the mother and the baby somehow.

**Question:** What else?

**Answer:** They push like this (giggling, a woman demonstrates)

**Question:** What else?

**Answer:** Nothing else. They have no choice if they do not want to go to hospital.

**Question:** What do they do in the hospital?

**Answer:** The doctor will give bottle (drip) and injection so woman delivers fast.

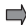

## Open codes

External pushing-  
- not good but essential

- saves lives of mother and baby

-because no other choice at home

The drip –  
- Is given in hospital  
-Hastens the birth process  
-Given by doctor

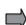

## Selective codes

Childbirth Interventions thought necessary to save lives

The drip compensates for external pushing  
Drip and hospital

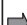

## Category

### A subprocess

Cultural conceptualizations of childbirth

&

Readiness to accept medical interventions
